# Supplementary material for: Sedation Agents Differentially Modulate Cortical and Subcortical Blood Oxygenation: Evidence from Ultra-High Field MRI at 17.2 T
Source: PubMed Central journal article supplement (PMC4106755; doi:10.1371/journal.pone.0100323), 2014-07-22

**Supporting Information Figure S1: Normality of T2\*-oxygenation-ratio measured during Isoflurane sessions**

**A Cortex**

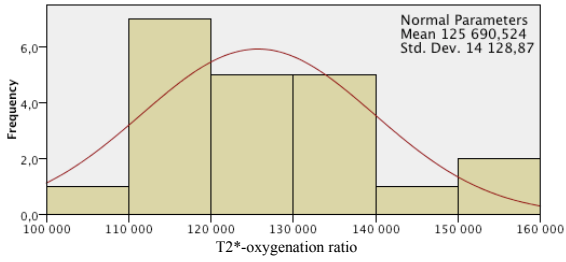

**B Hippocampus**

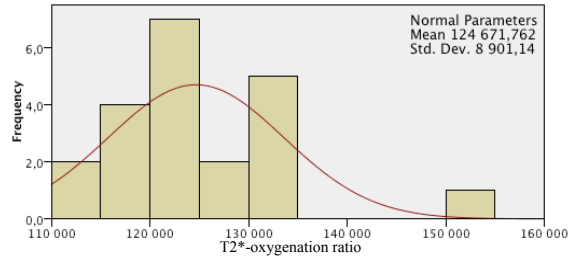

**C Striatum**

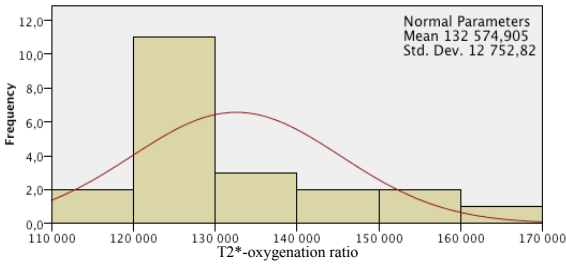

**D Thalamus**

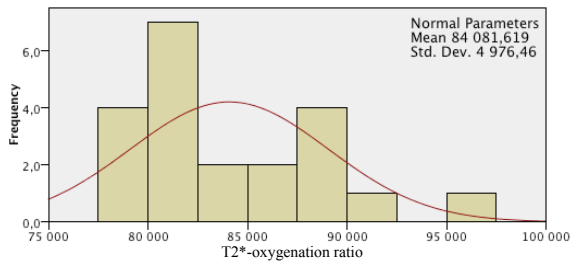

Supplement: pone.0100323.s001.pdf [file pone.0100323.s001.pdf]
